# Supplementary material
Source: publisher site journal article supplement (https://www.dovepress.com/article/404087)
Supplement: Supplementary file 1 [file get_supplementary_file.php]

**Supplemental Table 1. Upstream regulators predicted by IPA based on DEPs**

| Upstream Regulator | Molecule Type | Predicted Activation State | Activation z-score | Log10(p-value) |
| --- | --- | --- | --- | --- |
| GATA1 | transcription regulator | Inhibited | -2.647 | 3.8477117 |
| NR0B2 | nuclear receptor | Inhibited | -2.38 | 1.9318141 |
| GMNN | transcription regulator | Inhibited | -2.236 | 2.1051303 |
| SOX1 | transcription regulator | Inhibited | -2.236 | 2.3400838 |
| SOX3 | transcription regulator | Inhibited | -2.236 | 2.1719849 |
| MXD1 | transcription regulator | Inhibited | -2.219 | 2.1493538 |
| IFNA2 | cytokine | Activated | 2.383 | 1.9318141 |
| PRL | cytokine | Activated | 2.396 | 1.5783961 |
| REL | transcription regulator | Activated | 2.433 | 2.4659739 |
| HSF1 | transcription regulator | Activated | 2.469 | 2.5301780 |
| TCF7L2 | transcription regulator | Activated | 2.547 | 1.7375489 |
| NFE2L2 | transcription regulator | Activated | 2.587 | 8.6326441 |
